# Supplementary material for: The first controlled reduction of the high explosive RDXElectronic supplementary information (ESI) available: full experimental details on the synthesis and analysis of the reported compounds. See http://www.rsc.org/suppdata/cc/b2/b207885f/
Source: Royal Society of Chemistry journal article supplement (doi:10.1039/b207885f), 2002-09-26
Supplement: b207885f.doc [file b207885f.doc]

The First Controlled Reduction of the High Explosive RDX

Callum J. McHugh,a W. Ewen Smith,*a Richard Laceyb and Duncan Graham*a

a Department of Pure and Applied Chemistry, University of Strathclyde, 295 Cathedral Street, Glasgow, G1 1XL UK Fax: 0141 552 0876; Tel: 0141 548 4701; E-mail: duncan.graham@strath.ac.uk

b Police Scientific Branch, The Home Office, Sandridge, St Albans UK

# Supplementary Material

**Reduction of RDX by Na(Hg)/THF/H2O to give N,N’-Bis-(2-nitro-benzylidene)-hydrazine**

A 4% sodium amalgam was prepared by careful dissolution of sodium metal (0.400 g, 16.7 mmol) in mercury (9.600 g, 42.7 mmol) under an atmosphere of argon. A solution of RDX (0.222 g, 1.0 mmol) in anhydrous THF (10 ml) was poured onto the amalgam and the mixture was stirred. Distilled water (10 ml) was added carefully to the stirred solution. After stirring for 30 minutes the THF was removed *in vacuo* to leave an aqueous solution and a gelatinous precipitate. The solution was neutralised carefully to pH 7 by dropwise addition of glacial acetic acid and *o*-nitrobenzaldehyde (0.450 g, 3 mmol) in methanol (10 ml) was added slowly with vigorous stirring. After 30 minutes a bright yellow solution and yellow precipitate were afforded. The solids were collected by filtration and washed with cold methanol. The resulting yellow solution was extracted with ethyl acetate (20 ml) and sodium chloride solution (4 x 20 ml) and the organic layer was dried over sodium sulphate. Removal of the solvent *in vacuo* afforded a yellow solid. The combined solids were washed with cold diethyl ether and dried under vacuum to afford the azine derivative as a pale yellow powder (0.050 g, 17 %). max (DMSO)/nm 263 ( = 21568). 1H NMR (DMSO‑d6)  7.79 (2H, dd, *J* = 7.64, 7.44 Hz, ArH), 7.88 (2H, dd, *J* = 7.64, 7.44 Hz, ArH), 8.15 (4H, d, *J* = 8.08 Hz, ArH), 8.97 (2H, s, CH=N). *m/z* (EI) 299.07817 [C14H10N4O4 (M)+ < 0.5 ppm]. Anal. Calcd for C14H10N4O4: C, 56.38; H, 3.34; N, 18.79. Found C, 56.59; H, 3.23; N, 18.26.

**Reduction of RDX by Na(Hg)/THF/H2O to give N,N’-Bis-(2-hydroxy-benzylidene)-hydrazine**

As per the general reduction method from RDX (0.222 g, 1 mmol) to afford the azine derivative as a cream powder (0.050 g, 21 %). max (DMSO)/nm 356 ( = 25634). 1H NMR (CDCl3)  6.98 (2H, t, *J* = 6.84, 7.40 Hz, ArH), 7.04 (2H, d, *J* = 8.24 Hz, ArH), 7.38 (4H, m, ArH), 8.72 (2H, s, CH=N), 11.39 (2H, s, OH). *m/z* (EI) 240.08975 [C14H12N2O2 (M)+ < 0.5 ppm]. Anal. Calcd for C14H12N2O2: C, 70.00; H, 5.00; N, 11.67. Found C, 70.05; H, 5.02; N, 11.77.

# Preparation of 2-Hydroxy-5-(pyridin-3-ylazo)-benzaldehyde

3-Aminopyridine (0.883 g, 9.39 mmol) was dissolved in 50% HCl/H2O (5 ml) and cooled in an ice bath to 0 C. A cooled solution of NaNO2 (0.713 g, 10.33 mmol) in distilled water (2 ml) was added dropwise to the amine solution with vigorous stirring. After complete addition of sodium nitrite the resulting solution was stirred until excess nitrous acid was detected by the starch iodide test. The solution was added to salicyaldehyde (1 ml, 9.39 mmol) in NaHCO3 buffer (1 M, 50 ml, pH 8) with methanol (10 ml) and water (10 ml) to give an intense orange colour. Acidification with 50 % HCl/H2O afforded a yellow precipitate that was collected by filtration, washed with water and then dried under vacuum to afford the azo dye as a pale yellow powder in 65 % yield. max (MeOH)/nm 399, 442 ( = 31900, 2780). 1H NMR (CDCl3) δ 7.15 (1H, d, *J* = 8.9 Hz, ArH), 7.46 (1H, dd, *J* = 4.7 and 4.7 Hz, ArH), 8.14 (1H, d, *J* = 8.1 Hz, ArH), 8.20 (1H, d, *J* = 8.8 Hz, ArH), 8.25 (1H, s, ArH), 8.71 (1H, d, *J* = 4.6 Hz, ArH), 9.18 (1H, s, ArH), 10.05 (1H, s, CHO), 11.40 (1H, s, OH). *m/z* (EI) 227.06926 [C12H9N3O2 (M)+ < 1.0 ppm].

# Preparation of N,N’-Bis-2-Hydroxy-5-(pyridin-3-ylazo)-benzylidene-hydrazine [10]

To a solution of 2-Hydroxy-5-(pyridin-3-ylazo)-benzaldehyde (0.057 g, 0.25 mmol) in ethanol (5 ml) was added dropwise hydrazine hydrate (0.125 ml of 1 M solution in ethanol) with vigorous stirring. After 20 minutes the yellow precipitate formed was collected by filtration, washed with cold ethanol and dried to afford the azine [10] as a yellow powder in 23 % yield. A mixture of the azine [10] and hydrazone derivative was also obtained by this method from the remaining filtrate in a ratio of 7:3 by proton NMR to give total conversion to the azine in an overall yield of 75 %. max (DMSO)/nm 517 ( = 13238). 1H NMR (DMSO)  7.14 (2H, d, *J* = 8.84 Hz, ArH), 7.60 (2H, dd, *J* = 4.84, 4.88 Hz, ArH), 7.98 (2H, d, *J* = 8.80 Hz, ArH), 8.14 (2H, d, *J* = 8.40 Hz, ArH), 8.31 (2H, s, ArH), 8.71 (2H, d, *J* = 4.60 Hz, ArH), 8.76 (2H, s, CH=N), 9.07 (2H, s, ArH), 12.13 (2H, br s, OH). *m/z* (FAB) 451.16123 [C24H19N8­O2 (M+H)+ < 4.1 ppm]. Anal. Calcd for C24H18N8­O2.H2O: C, 61.53; H, 4.27; N, 23.93. Found C, 62.26; H, 4.01; N, 23.45.
